# Supplementary material for: Formation of [2 + 2] diruthenium(ii) metallomacrocycles from ligands containing 2,2′:6′,2″-terpyridine domains linked through flexible polyethyleneoxy spacers
Source: Royal Society of Chemistry journal article supplement (doi:10.1039/b504670j), 2005-01-01
Supplement: b504670j.pdf [file b504670j.pdf]

## Supplementary figures

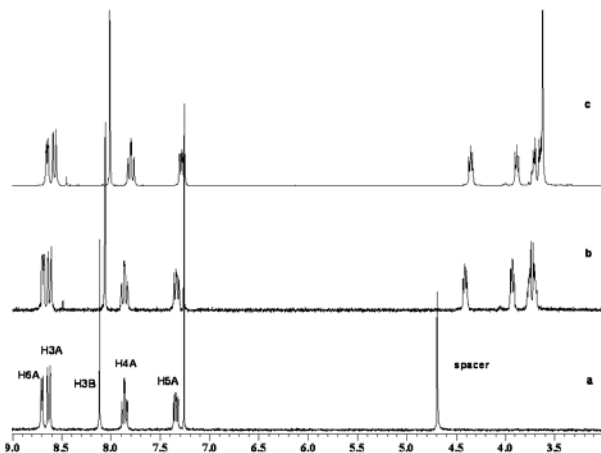

**Fig. S1** The <sup>1</sup>H NMR spectra of ligands (a) **I** (300 MHz, CDCl<sub>3</sub>/DMSO-d<sub>6</sub>), (b) **II** (250 MHz, CDCl<sub>3</sub>) and (c) **III** (250 MHz, CDCl<sub>3</sub>). Ring numbering for the terpy-domain is given in Scheme 1.

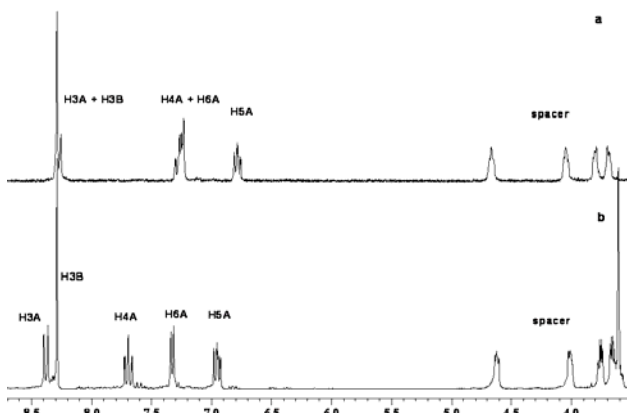

**Fig. S2** 250 MHz <sup>1</sup>H NMR spectra of a) [Ru<sub>2</sub>(**II**)<sub>2</sub>][PF<sub>6</sub>]<sub>4</sub> and b) [Ru<sub>2</sub>(**III**)<sub>2</sub>][PF<sub>6</sub>]<sub>4</sub> in CD<sub>3</sub>CN showing assignments. Ring labels are as defined in Scheme 1.

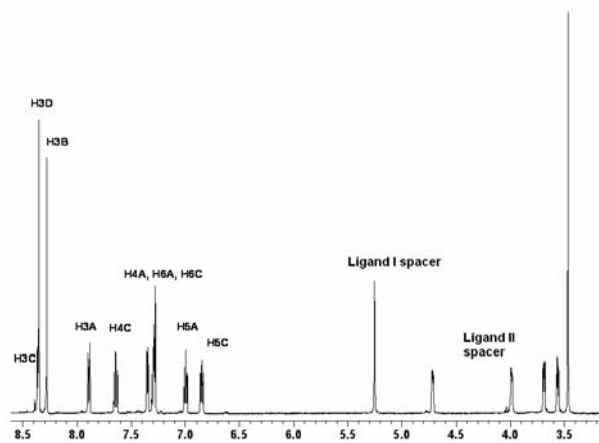

**Fig. S3** The 500 MHz <sup>1</sup>H NMR spectrum of a CD<sub>3</sub>CN solution of [Ru<sub>2</sub>(**I**)(**III**)][PF<sub>6</sub>]<sub>4</sub> showing the assignments.

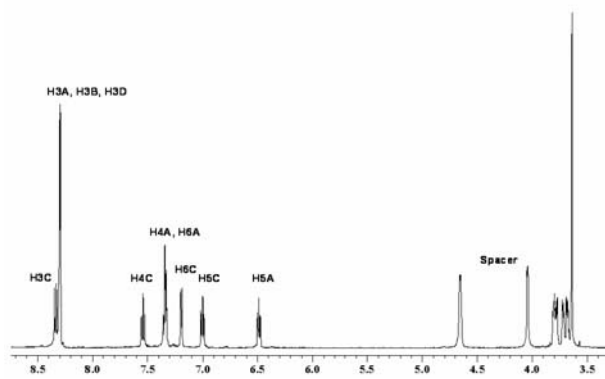

Fig. S4. The 500 MHz <sup>1</sup>H NMR spectrum of [Ru<sub>2</sub>(II)(III)](PF<sub>6</sub>)<sub>4</sub> in CD<sub>3</sub>CN with assignments.
